# Supplementary material for: G Protein-Coupling of Adhesion GPCRs ADGRE2/EMR2 and ADGRE5/CD97, and Activation of G Protein Signalling by an Anti-EMR2 Antibody
Source: PubMed Central journal article supplement (PMC6976652; doi:10.1038/s41598-020-57989-6), 2020-01-22

## Supplementary Information

### **G Protein-Coupling of Adhesion GPCRs ADGRE2/EMR2 and ADGRE5/CD97, and Activation of G Protein Signalling by an Anti-EMR2 Antibody**

Nisha Bhudia<sup>1</sup>, Sapna Desai<sup>1</sup>, Natalie King<sup>2</sup>, Nicolas Ancellin<sup>3</sup>, Didier Grillot<sup>3</sup>, Ashley A. Barnes<sup>4</sup> and Simon J. Dowell<sup>1\*</sup>

<sup>1</sup>Medicinal Science and Technology, GlaxoSmithKline, Stevenage, UK; <sup>2</sup>Excelya Clinical Research, Boulogne-Billancourt, France; <sup>3</sup>Oncodesign, Villebon-Sur-Yvette, France; <sup>4</sup>Censo Biotechnologies Ltd, Babraham, UK

\*Corresponding author

#### **Contact details:**

**Nisha Bhudia** ([nisha.6.bhudia@gsk.com](mailto:nisha.6.bhudia@gsk.com))

**Sapna Desai** ([sapna.x.desai@gsk.com](mailto:sapna.x.desai@gsk.com))

**Natalie King** ([eilatan90@gmail.com](mailto:eilatan90@gmail.com))

**Nicolas Ancellin** ([nicolas.ancellin@oncodesign.com](mailto:nicolas.ancellin@oncodesign.com))

**Didier Grillot** ([didier.grillot@oncodesign.com](mailto:didier.grillot@oncodesign.com))

**Ashley Barnes** ([ashley.barnes@censobio.com](mailto:ashley.barnes@censobio.com))

**Simon Dowell** ([simon.j.dowell@gsk.com](mailto:simon.j.dowell@gsk.com)) – corresponding author

Figure S1

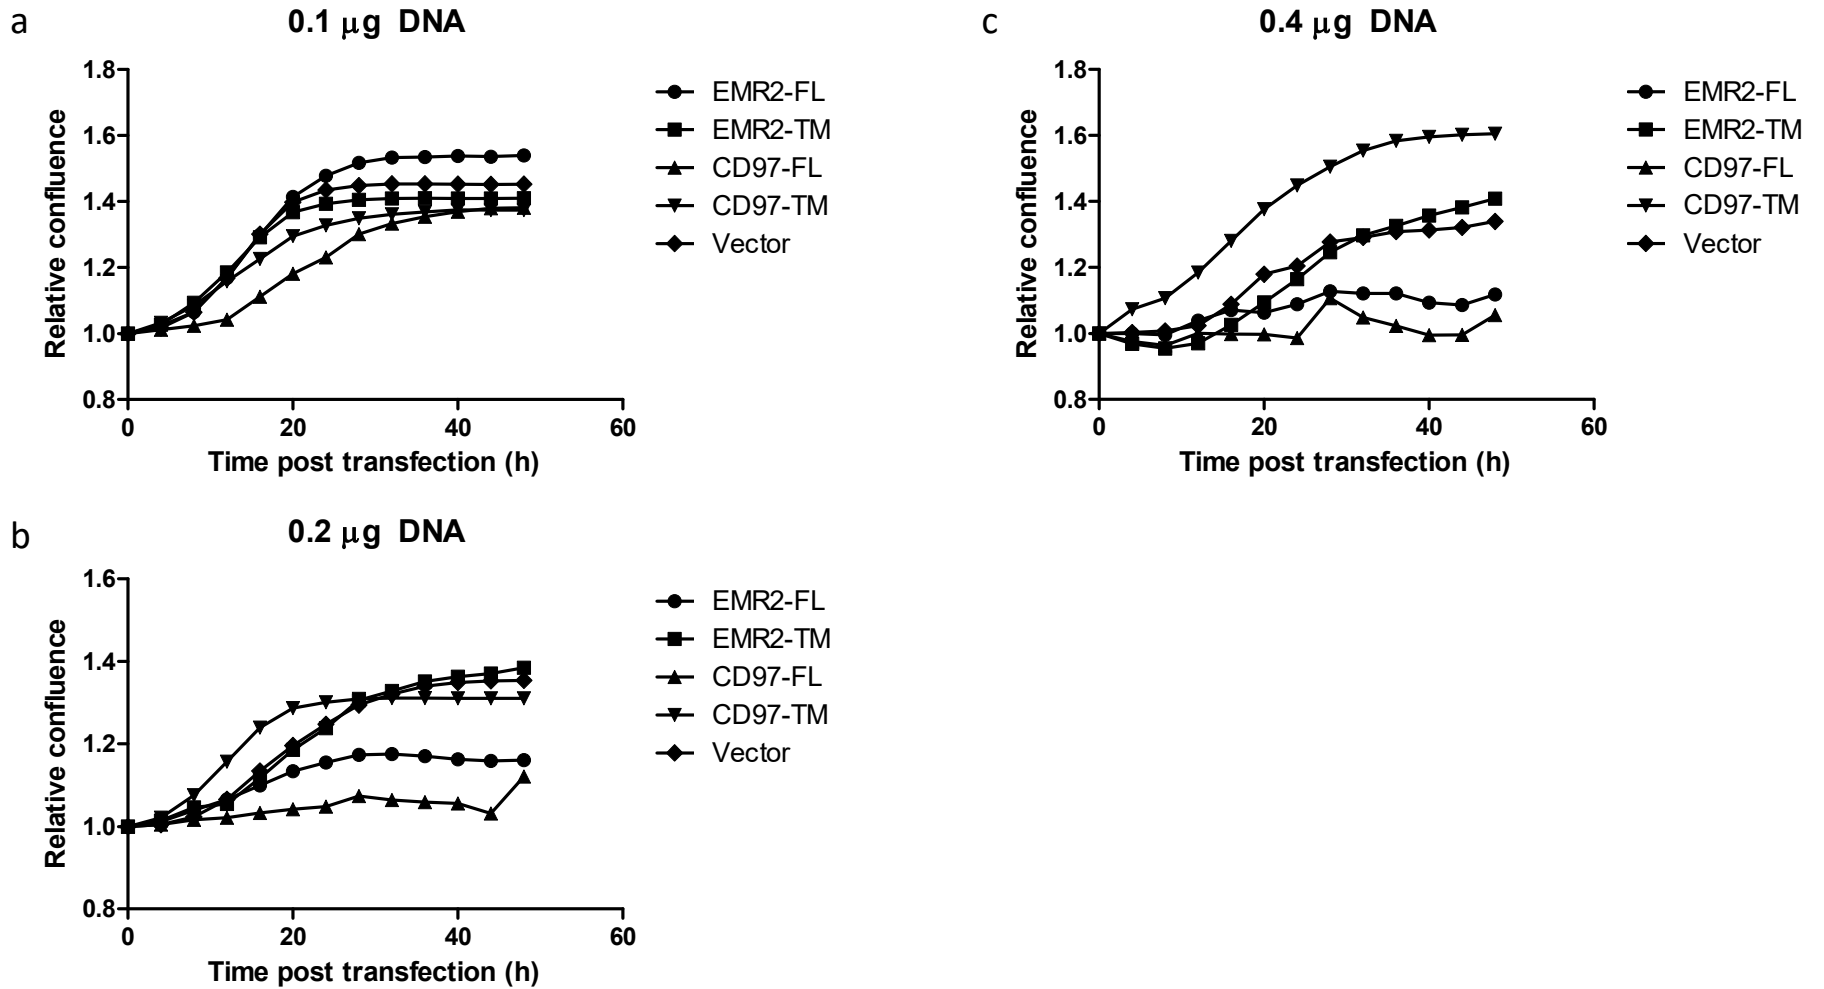

Figure S2

a

**EMR2**

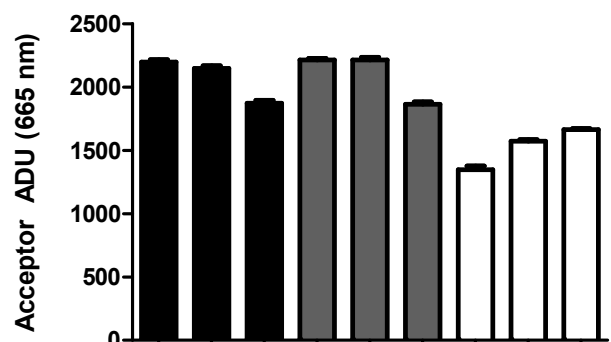

| DNA [ $\mu\text{g}/\text{cm}^2$ ] | 0.4     | 0.2 | 0.1 | 0.4      | 0.2 | 0.1 | 0.4    | 0.2 | 0.1 |
|-----------------------------------|---------|-----|-----|----------|-----|-----|--------|-----|-----|
| Construct                         | EMR2-FL |     |     | EMR2-CTF |     |     | Vector |     |     |

b

**CD97**

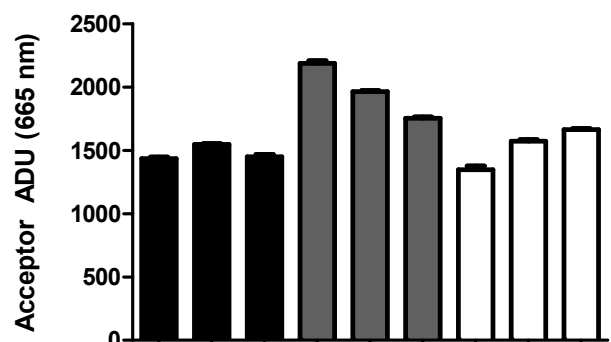

| DNA [ $\mu\text{g}/\text{cm}^2$ ] | 0.4     | 0.2 | 0.1 | 0.4      | 0.2 | 0.1 | 0.4    | 0.2 | 0.1 |
|-----------------------------------|---------|-----|-----|----------|-----|-----|--------|-----|-----|
| Construct                         | CD97-FL |     |     | CD97-CTF |     |     | Vector |     |     |

Figure S3

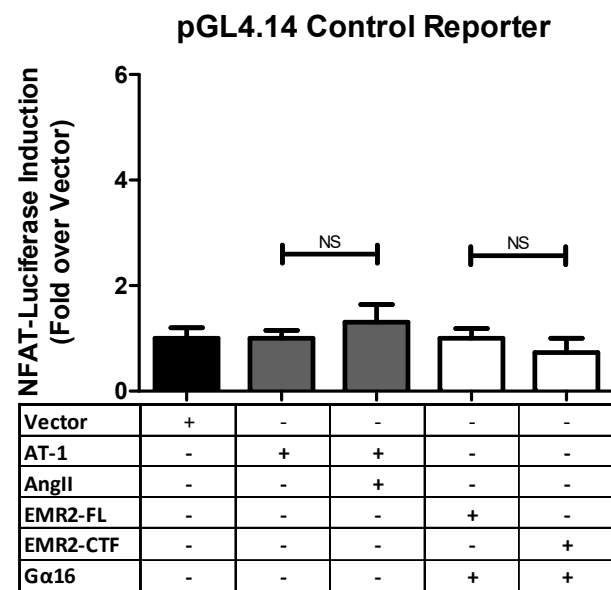

Supplement: 41598_2020_57989_MOESM1_ESM.pdf [file 41598_2020_57989_MOESM1_ESM.pdf]
